# Supplementary material
Source: publisher site journal article supplement (https://www.dovepress.com/article/462985)
Supplement: Supplementary file 1 [file get_supplementary_file.php]

**Table S1**. Clinical and pathological characteristics of 127 LARC patients with TNT.

| **Factors** | **Patients, n (%) or mean (± SD)** |
| --- | --- |
| No. of patients | 127 |
| Age (Mean ± SD) | 54.1 ± 11.4 |
| ≤ 60 | 71 (67.0) |
| > 60 | 35 (33.0) |
| Sex |  |
| Male | 88 (69.3) |
| Female | 39 (30.7) |
| BMI | 23.5 ± 3.0 |
| Pre-TNT cT stage |  |
| 2 | 5 (3.9) |
| 3 | 80 (63.0) |
| 4 | 42 (33.1) |
| Pre-TNT cN |  |
| 0 | 11 (10.4) |
| 1 | 49 (41.5) |
| 2 | 67 (48.1) |
| Pre-TNT TNM Stage |  |
| IIA | 8 (6.3) |
| IIIA | 3 (2.4) |
| IIIB | 67 (52.7) |
| IIIC | 49 (38.6) |
| Pre-TNT CRM +, (n, %) | 44 (34.6) |
| Pre-TNT EMVI +, (n, %) | 45 (35.4) |
| Pre-TNT tumor diameter | 5.4 ± 1.7 |
| Pre-TNT Distance from anal verge | 4.8 ± 1.4 |
| Grade 3/4 adverse events |  |
| Total | 30 (23.6) |
| Neutropenia | 17 (13.4) |
| Anemia | 14 (11.0) |
| Thrombocytopenia | 14 (11.0) |
| Diarrhea | 6 (4.7) |
| Vomiting | 4 (3.1) |
| Radiation dermatitis | 2 (1.6) |
| Pre-TNT Albumin | 41.6 ± 5.9 |
| Pre-TNT WBC | 6.65 ± 1.92 |
| Pre-TNT Neutrophil | 4.26 ± 1.60 |
| Pre-TNT Lymphocyte | 1.72 ± 0.55 |
| Pre-TNT Platelet | 247.9 ± 75.1 |
| Pre-TNT Hemoglobin | 128.5 ± 22.4 |
| Pre-TNT CEA | 9.9 ± 18.7 |
| Pre-TNT CA19-9 | 35.8 ± 69.1 |
| Pre-TNT CD4+ T cell | 645.4 ± 251.0 |
| Pre-TNT CD8+ T cell | 395.4 ± 208.3 |
| Pre-TNT CD4+/CD8+ T cell ratio | 1.84 ± 0.76 |
| Pre-TNT NK cell | 258.2 ± 146.3 |
| Pre-TNT NK/T cell ratio | 16.9 ± 9.0 |
| Pre-TNT NLR | 2.83 ± 2.34 |
| Pre-TNT PLR | 158.5 ± 78.4 |
| Pre-TNT HALP | 41.8 ± 23.7 |
| Pre-TNT PNI | 50.2 ± 6.7 |
| Pre-TNT GNRI | 106.5 ± 11.1 |
| Post-TNT tumor diameter | 3.3 ± 1.6 |
| Post-TNT Distance from anal verge | 5.3 ± 2.1 |
| Post-TNT cT stage without surgery |  |
| cT0a | 13 (72.2) |
| cT3 or cT4b | 5 (17.8) |
| Post-TNT pT stage with surgery |  |
| pT0 | 18 (16.5) |
| pT1 | 8 (7.3) |
| pT2 | 36 (33.0) |
| pT3 | 28 (25.7) |
| pT4 | 19 (17.4) |
| Post-TNT cN stage without surgery |  |
| cN0a | 13 (72.2) |
| cN1 or cN2b | 5 (17.8) |
| Post-TNT pN stage with surgery |  |
| pN0 | 73 (67.0) |
| pN1 | 33 (30.3) |
| pN2 | 3 (2.7) |
| Grade |  |
| NA due to W&W | 24 (18.9) |
| NA due to TRG0/1 | 13 (10.2) |
| NA due to progression | 5 (4.0) |
| G1 | 21 (16.5) |
| G2 | 58 (45.7) |
| G3 | 6 (4.7) |
| Lymphovascular invasion +, (n, %) | 18 (14.5) |
| Perineural invasion +, (n, %) | 16 (12.9) |
| Resection margin |  |
| R0 | 107 (84.2) |
| R1 | 2 (1.6) |
| No surgeryc | 18 (14.2) |
| MSI status |  |
| dMMR/MSI-H | 69 (54.3) |
| pMMR/MSS | 0 (0) |
| NAd | 58 (45.7) |
| EGFR status |  |
| + | 34 (26.8) |
| - | 29 (22.8) |
| NAd | 64 (50.4) |
| HER2 status |  |
| + | 7 (5.5) |
| - | 57 (44.9) |
| NAd | 63 (49.6) |
| Post-TNT treatment |  |
| Dixon's procedure | 95 (74.8) |
| Hartmann’s procedure | 4 (3.1) |
| Miles’ procedure | 10 (7.9) |
| W&W | 13 (10.2) |
| Systemic therapy | 5 (3.9) |
| Treatment response |  |
| Good response | 70 (55.1) |
| Poor response | 57 (44.9) |

aPatient entered watch and wait protocol; bPatients did not undergo surgery due to tumor progression; cPatient did not undergo surgery due to watch and wait protocol or tumor progression; dThe surgical specimen exhibits a TRG0/1 treatment effect, or patients did not undergone surgery; BMI, body mass index; CA19-9, Carbohydrate antigen 19-9; CEA, carcinoembryonic antigen; CRM, circumferential resection margin; cT/N stage, clinical T/N stage; EMVI, extramural venous invasion; NA, not available; TNT, total neoadjuvant therapy; TRG, tumor regression grade; W&W, watch and wait.
